# Supplementary material for: Prevention of Viral Hepatitis and HIV Infection among People Who Inject Drugs: A Systematic Review and Meta-Analysis
Source: MDPI journal article supplement (doi:10.3390/v16010142), 2024-01-18
Supplement: s1 [file s1]

## Supplementary materials

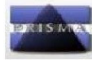

### PRISMA 2020 for Abstracts Checklist

| Section and Topic       | Item # | Checklist item                                                                                                                                                                                                                                                                                        | Reported (Yes/No) |
|-------------------------|--------|-------------------------------------------------------------------------------------------------------------------------------------------------------------------------------------------------------------------------------------------------------------------------------------------------------|-------------------|
| <b>TITLE</b>            |        |                                                                                                                                                                                                                                                                                                       |                   |
| Title                   | 1      | Identify the report as a systematic review.                                                                                                                                                                                                                                                           | Yes               |
| <b>BACKGROUND</b>       |        |                                                                                                                                                                                                                                                                                                       |                   |
| Objectives              | 2      | Provide an explicit statement of the main objective(s) or question(s) the review addresses.                                                                                                                                                                                                           | Yes               |
| <b>METHODS</b>          |        |                                                                                                                                                                                                                                                                                                       |                   |
| Eligibility criteria    | 3      | Specify the inclusion and exclusion criteria for the review.                                                                                                                                                                                                                                          | Yes               |
| Information sources     | 4      | Specify the information sources (e.g. databases, registers) used to identify studies and the date when each was last searched.                                                                                                                                                                        | Yes               |
| Risk of bias            | 5      | Specify the methods used to assess risk of bias in the included studies.                                                                                                                                                                                                                              | Yes               |
| Synthesis of results    | 6      | Specify the methods used to present and synthesise results.                                                                                                                                                                                                                                           | Yes               |
| <b>RESULTS</b>          |        |                                                                                                                                                                                                                                                                                                       |                   |
| Included studies        | 7      | Give the total number of included studies and participants and summarise relevant characteristics of studies.                                                                                                                                                                                         | Yes               |
| Synthesis of results    | 8      | Present results for main outcomes, preferably indicating the number of included studies and participants for each. If meta-analysis was done, report the summary estimate and confidence/credible interval. If comparing groups, indicate the direction of the effect (i.e. which group is favoured). | Yes               |
| <b>DISCUSSION</b>       |        |                                                                                                                                                                                                                                                                                                       |                   |
| Limitations of evidence | 9      | Provide a brief summary of the limitations of the evidence included in the review (e.g. study risk of bias, inconsistency and imprecision).                                                                                                                                                           | Yes               |
| Interpretation          | 10     | Provide a general interpretation of the results and important implications.                                                                                                                                                                                                                           | Yes               |
| <b>OTHER</b>            |        |                                                                                                                                                                                                                                                                                                       |                   |
| Funding                 | 11     | Specify the primary source of funding for the review.                                                                                                                                                                                                                                                 | Yes               |
| Registration            | 12     | Provide the register name and registration number.                                                                                                                                                                                                                                                    | Yes               |

From: Page MJ, McKenzie JE, Bossuyt PM, Boutron I, Hoffmann TC, Mulrow CD, et al. The PRISMA 2020 statement: an updated guideline for reporting systematic reviews. *BMJ* 2021;372:n71. doi: 10.1136/bmj.n71

For more information, visit: <http://www.prisma-statement.org/>

Figure S1: PRISMA 2020 for abstracts checklist

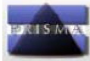

## PRISMA 2020 Checklist

| Section and Topic             | Item # | Checklist item                                                                                                                                                                                                                                                                                       | Location where item is reported               |
|-------------------------------|--------|------------------------------------------------------------------------------------------------------------------------------------------------------------------------------------------------------------------------------------------------------------------------------------------------------|-----------------------------------------------|
| <b>TITLE</b>                  |        |                                                                                                                                                                                                                                                                                                      |                                               |
| Title                         | 1      | Identify the report as a systematic review.                                                                                                                                                                                                                                                          | Title                                         |
| <b>ABSTRACT</b>               |        |                                                                                                                                                                                                                                                                                                      |                                               |
| Abstract                      | 2      | See the PRISMA 2020 for Abstracts checklist.                                                                                                                                                                                                                                                         | Abstract                                      |
| <b>INTRODUCTION</b>           |        |                                                                                                                                                                                                                                                                                                      |                                               |
| Rationale                     | 3      | Describe the rationale for the review in the context of existing knowledge.                                                                                                                                                                                                                          | Introduction (Section 1)                      |
| Objectives                    | 4      | Provide an explicit statement of the objective(s) or question(s) the review addresses.                                                                                                                                                                                                               | Introduction (Section 1)                      |
| <b>METHODS</b>                |        |                                                                                                                                                                                                                                                                                                      |                                               |
| Eligibility criteria          | 5      | Specify the inclusion and exclusion criteria for the review and how studies were grouped for the syntheses.                                                                                                                                                                                          | Materials and Methods (Section 2.2)           |
| Information sources           | 6      | Specify all databases, registers, websites, organisations, reference lists and other sources searched or consulted to identify studies. Specify the date when each source was last searched or consulted.                                                                                            | Materials and Methods (Section 2.1)           |
| Search strategy               | 7      | Present the full search strategies for all databases, registers and websites, including any filters and limits used.                                                                                                                                                                                 | Materials and Methods (Section 2.1; Table S1) |
| Selection process             | 8      | Specify the methods used to decide whether a study met the inclusion criteria of the review, including how many reviewers screened each record and each report retrieved, whether they worked independently, and if applicable, details of automation tools used in the process.                     | Materials and Methods (Section 2.3)           |
| Data collection process       | 9      | Specify the methods used to collect data from reports, including how many reviewers collected data from each report, whether they worked independently, any processes for obtaining or confirming data from study investigators, and if applicable, details of automation tools used in the process. | Materials and Methods (Section 2.3)           |
| Data items                    | 10a    | List and define all outcomes for which data were sought. Specify whether all results that were compatible with each outcome domain in each study were sought (e.g. for all measures, time points, analyses), and if not, the methods used to decide which results to collect.                        | Materials and Methods (Section 2.1)           |
|                               | 10b    | List and define all other variables for which data were sought (e.g. participant and intervention characteristics, funding sources). Describe any assumptions made about any missing or unclear information.                                                                                         | Materials and Methods (Sections 2.2 & 2.3)    |
| Study risk of bias assessment | 11     | Specify the methods used to assess risk of bias in the included studies, including details of the tool(s) used, how many reviewers assessed each study and whether they worked independently, and if applicable, details of automation tools used in the process.                                    | Materials and Methods (Section 2.4)           |
| Effect measures               | 12     | Specify for each outcome the effect measure(s) (e.g. risk ratio, mean difference) used in the synthesis or presentation of results.                                                                                                                                                                  | Materials and Methods (Section 2.4)           |
| Synthesis methods             | 13a    | Describe the processes used to decide which studies were eligible for each synthesis (e.g. tabulating the study intervention characteristics and comparing against the planned groups for each synthesis (item #5)).                                                                                 | Materials and Methods (Section 2.4)           |
|                               | 13b    | Describe any methods required to prepare the data for presentation or synthesis, such as handling of missing summary statistics, or data conversions.                                                                                                                                                | Materials and Methods (Section 2.4)           |

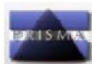

## PRISMA 2020 Checklist

| Section and Topic             | Item # | Checklist item                                                                                                                                                                                                                                                                       | Location where item is reported     |
|-------------------------------|--------|--------------------------------------------------------------------------------------------------------------------------------------------------------------------------------------------------------------------------------------------------------------------------------------|-------------------------------------|
|                               | 13c    | Describe any methods used to tabulate or visually display results of individual studies and syntheses.                                                                                                                                                                               | Materials and Methods (Section 2.4) |
|                               | 13d    | Describe any methods used to synthesize results and provide a rationale for the choice(s). If meta-analysis was performed, describe the model(s), method(s) to identify the presence and extent of statistical heterogeneity, and software package(s) used.                          | Materials and Methods (Section 2.4) |
|                               | 13e    | Describe any methods used to explore possible causes of heterogeneity among study results (e.g. subgroup analysis, meta-regression).                                                                                                                                                 | Materials and Methods (Section 2.4) |
|                               | 13f    | Describe any sensitivity analyses conducted to assess robustness of the synthesized results.                                                                                                                                                                                         | Materials and Methods (Section 2.4) |
| Reporting bias assessment     | 14     | Describe any methods used to assess risk of bias due to missing results in a synthesis (arising from reporting biases).                                                                                                                                                              | Materials and Methods (Section 2.4) |
| Certainty assessment          | 15     | Describe any methods used to assess certainty (or confidence) in the body of evidence for an outcome.                                                                                                                                                                                | Materials and Methods (Section 2.4) |
| <b>RESULTS</b>                |        |                                                                                                                                                                                                                                                                                      |                                     |
| Study selection               | 16a    | Describe the results of the search and selection process, from the number of records identified in the search to the number of studies included in the review, ideally using a flow diagram.                                                                                         | Figure 1                            |
|                               | 16b    | Cite studies that might appear to meet the inclusion criteria, but which were excluded, and explain why they were excluded.                                                                                                                                                          | Supplementary materials (Table S2)  |
| Study characteristics         | 17     | Cite each included study and present its characteristics.                                                                                                                                                                                                                            | Supplementary materials (Table S3)  |
| Risk of bias in studies       | 18     | Present assessments of risk of bias for each included study.                                                                                                                                                                                                                         | Materials and Methods (Section 2.4) |
| Results of individual studies | 19     | For all outcomes, present, for each study: (a) summary statistics for each group (where appropriate) and (b) an effect estimate and its precision (e.g. confidence/credible interval), ideally using structured tables or plots.                                                     | Results (Figures 2 - 4)             |
| Results of syntheses          | 20a    | For each synthesis, briefly summarise the characteristics and risk of bias among contributing studies.                                                                                                                                                                               | Results & Section 2.4               |
|                               | 20b    | Present results of all statistical syntheses conducted. If meta-analysis was done, present for each the summary estimate and its precision (e.g. confidence/credible interval) and measures of statistical heterogeneity. If comparing groups, describe the direction of the effect. | Results (Figures 2 - 4)             |
|                               | 20c    | Present results of all investigations of possible causes of heterogeneity among study results.                                                                                                                                                                                       | Results (Section 3)                 |

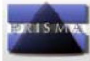

## PRISMA 2020 Checklist

| Section and Topic                              | Item # | Checklist item                                                                                                                                                                                                                             | Location where item is reported                         |
|------------------------------------------------|--------|--------------------------------------------------------------------------------------------------------------------------------------------------------------------------------------------------------------------------------------------|---------------------------------------------------------|
|                                                | 20d    | Present results of all sensitivity analyses conducted to assess the robustness of the synthesized results.                                                                                                                                 | Results<br>(Section 3)                                  |
| Reporting biases                               | 21     | Present assessments of risk of bias due to missing results (arising from reporting biases) for each synthesis assessed.                                                                                                                    | NA                                                      |
| Certainty of evidence                          | 22     | Present assessments of certainty (or confidence) in the body of evidence for each outcome assessed.                                                                                                                                        | Results<br>(Section 3)                                  |
| <b>DISCUSSION</b>                              |        |                                                                                                                                                                                                                                            |                                                         |
| Discussion                                     | 23a    | Provide a general interpretation of the results in the context of other evidence.                                                                                                                                                          | Discussion and conclusion<br>(Section 4)                |
|                                                | 23b    | Discuss any limitations of the evidence included in the review.                                                                                                                                                                            | Discussion and conclusion<br>(Section 4)                |
|                                                | 23c    | Discuss any limitations of the review processes used.                                                                                                                                                                                      | Discussion and conclusion<br>(Section 4)                |
|                                                | 23d    | Discuss implications of the results for practice, policy, and future research.                                                                                                                                                             | Discussion and conclusion<br>(Section 4)                |
| <b>OTHER INFORMATION</b>                       |        |                                                                                                                                                                                                                                            |                                                         |
| Registration and protocol                      | 24a    | Provide registration information for the review, including register name and registration number, or state that the review was not registered.                                                                                             | Section 2.4; Yen-Ju Chen; PROSPERO (no. CRD42023460728) |
|                                                | 24b    | Indicate where the review protocol can be accessed, or state that a protocol was not prepared.                                                                                                                                             | Section 2.4                                             |
|                                                | 24c    | Describe and explain any amendments to information provided at registration or in the protocol.                                                                                                                                            | Section 2.4                                             |
| Support                                        | 25     | Describe sources of financial or non-financial support for the review, and the role of the funders or sponsors in the review.                                                                                                              | Funding                                                 |
| Competing interests                            | 26     | Declare any competing interests of review authors.                                                                                                                                                                                         | Not applicable                                          |
| Availability of data, code and other materials | 27     | Report which of the following are publicly available and where they can be found: template data collection forms; data extracted from included studies; data used for all analyses; analytic code; any other materials used in the review. | Section 2.4 and Supplementary Materials                 |

Figure S2: PRISMA 2020 checklist

Table S1. Search strategy for PubMed and related databases

|     |                          |                                                                                                                                                                                                                                                                                                                                                                            |
|-----|--------------------------|----------------------------------------------------------------------------------------------------------------------------------------------------------------------------------------------------------------------------------------------------------------------------------------------------------------------------------------------------------------------------|
|     | Term 1:<br>Viruses       | "Hepatitis B Virus" OR "HBV" OR "Hep B" OR "Hepatitis C" OR "Hepatitis C Virus" OR "HCV" OR "Hep C" OR "Hepatitis C" OR "Human immunodeficiency virus" OR "HIV" OR "HIV-1"                                                                                                                                                                                                 |
| AND | Term 2:<br>Populations   | "Injection drug users" OR "injecting drug users" OR "persons who inject drugs" OR "people who inject drugs" OR "PWID" OR "substance abuse"                                                                                                                                                                                                                                 |
| AND | Term 3:<br>Interventions | "HBV vaccination" OR "education and counseling" OR "needle and syringe programs" OR "NSPs" OR "syringe services programs" OR "SSPs" OR "syringe exchange programs" OR "SEPs" OR "needle exchange programs" OR "NEPs" OR "harm reduction" OR "preexposure prophylaxis" OR "pre-exposure prophylaxis" OR "PrEP" OR "condom usage" OR "community support" OR "social support" |
| AND | Term 4:<br>Outcomes      | "Risk reduction" OR "co-infection" OR "efficacy" OR "adherence"                                                                                                                                                                                                                                                                                                            |
| AND | Term 5:<br>Diagnosis     | "Screening" OR "testing" OR "prevalence" OR "incidence" OR "positivity" OR "seropositive" OR "positive"                                                                                                                                                                                                                                                                    |

## 1. PubMed / Query box

**Search:** (((("Hepatitis B Virus" OR "HBV" OR "Hep B" OR "Hepatitis C" OR "Hepatitis C Virus" OR "HCV" OR "Hep C" OR "Hepatitis C" OR "Human immunodeficiency virus" OR "HIV" OR "HIV-1"[MeSH Terms]) AND ( "Injection drug users" OR "injecting drug users" OR "persons who inject drugs" OR "people who inject drugs" OR "PWID" OR "substance abuse"[MeSH Terms])) AND ("HBV vaccination" OR "education and counseling" OR "needle and syringe programs" OR "NSPs" OR "syringe services programs" OR "SSPs" OR "syringe exchange programs" OR "SEPs" OR "needle exchange programs" OR "NEPs" OR "harm reduction" OR "preexposure prophylaxis" OR "pre-exposure prophylaxis" OR "PrEP" OR "condom usage" OR "community support" OR "social support"[MeSH Terms])) AND ("Risk reduction" OR "co-infection" OR "efficacy" OR "adherence"[MeSH Terms])) AND ("Screening" OR "testing" OR "prevalence" OR "incidence" OR "positivity" OR "seropositive" OR "positive"[MeSH Terms])

**Filters:** In the last 10 years, English (n=87)

**Sort by:** Journal

## 2. Embase / PICO

#1 'injection drug user'/exp AND ('hepatitis vaccine'/exp OR 'medical education'/exp OR 'preventive health service'/exp OR 'syringe exchange program'/exp OR 'harm reduction'/exp OR 'preexposure prophylaxis'/exp OR 'condom use'/exp OR 'community support'/exp OR 'social support'/exp) AND

('risk reduction'/exp OR 'coinfection'/exp OR 'therapy'/exp OR 'patient compliance'/exp OR 'screening'/exp OR 'prevalence'/exp OR 'incidence'/exp OR 'seropositive reaction'/exp)

#2 AND ('acquired immune deficiency syndrome'/dm OR 'acute hepatitis c'/dm OR 'chronic hepatitis b'/dm OR 'chronic hepatitis c'/dm OR 'drug dependence'/dm OR 'hepatitis b'/dm OR 'hepatitis c'/dm OR 'heroin dependence'/dm OR 'human immunodeficiency virus infection'/dm OR 'infection rate'/dm OR 'reinfection'/dm OR 'virus hepatitis'/dm)

#3 AND (2014:py OR 2015:py OR 2016:py OR 2017:py OR 2018:py OR 2019:py OR 2020:py OR 2021:py OR 2022:py OR 2023:py)

n = 531

### **3. Cochrane Library**

Topics: Infectious disease

Year: 2014 - 2023

Language: English

matching people who inject drugs in Title Abstract Keyword OR Injecting drug users in Title Abstract Keyword OR "injecting-drug users" in Title Abstract Keyword OR Injection drug users in Title Abstract Keyword OR persons who inject drugs in Title Abstract Keyword - (Word variations have been searched)

n = 1,713

Table S2. Excluded studies and reasons

| Citations                                                                                                                                                                                                                                                                                                                                                                                 | Reasons                                                                                                       |
|-------------------------------------------------------------------------------------------------------------------------------------------------------------------------------------------------------------------------------------------------------------------------------------------------------------------------------------------------------------------------------------------|---------------------------------------------------------------------------------------------------------------|
| Heo, M.; Pericot-Valverde, I.; Niu, J.; Norton, B. L.; Akiyama, M. J.; Nahvi, S.; Arnsten, J. H.; Litwin, A. H., More intensive hepatitis C virus care models promote adherence among people who inject drugs with active drug use: the PREVAIL Study. <i>Journal of viral hepatitis</i> <b>2022</b> .                                                                                    | The study has identified concerns regarding this result in at least one domain.                               |
| Heo, M.; Pericot-Valverde, I.; Rennert, L.; Akiyama, M. J.; Norton, B. L.; Gormley, M.; Agyemang, L.; Arnsten, J. H.; Litwin, A. H., Hepatitis C Virus Direct-Acting Antiviral Treatment Adherence Patterns and Sustained Viral Response Among People Who Inject Drugs Treated in Opioid Agonist Therapy Programs. <i>Clinical infectious diseases</i> <b>2021</b> , 73, (11), 2093-2100. | The study has identified concerns regarding this result in at least one domain.                               |
| Zhang, J. Y.; Li, Z. B.; Zhang, L.; Wang, J.; Huang, L. P.; Zhan, G. L.; Li, Z.; Du, J.; Zhao, M., DOES IT WORK? -a randomized controlled trial to test the efficacy of HCV and HIV-related education on drug users in MMT, China. <i>BMC infectious diseases</i> <b>2019</b> , 19, (1), 774.                                                                                             | The study has identified concerns regarding this result in at least one domain.                               |
| Li, L.; Hien, N. T.; Liang, L. J.; Lin, C.; Lan, C. W.; Lee, S. J.; Tuan, N. A.; Tuan, L. A.; Thanh, D. C.; Ha, N. T. T., Efficacy of Communication Training of Community Health Workers on Service Delivery to                                                                                                                                                                           | Although the study had a low risk of bias, we excluded it because its focus was not aligned with our article. |

|                                                                                                                                             |  |
|---------------------------------------------------------------------------------------------------------------------------------------------|--|
| People Who Inject Drugs in Vietnam: a Clustered Randomized Trial. <i>American journal of public health</i> <b>2018</b> , 108, (6), 791-798. |  |
|---------------------------------------------------------------------------------------------------------------------------------------------|--|

Table S3. Details for extracting data from included randomized controlled trials (RCTs) and cluster-randomized trials (CRTs)

| Viral types | First author & Year  | Sample size                                                                                                                                   | Randomized groups                                                                                   | Related risk factors                                               | Outcomes                                  | Detection times                                                   |
|-------------|----------------------|-----------------------------------------------------------------------------------------------------------------------------------------------|-----------------------------------------------------------------------------------------------------|--------------------------------------------------------------------|-------------------------------------------|-------------------------------------------------------------------|
| <b>HBV</b>  |                      |                                                                                                                                               |                                                                                                     |                                                                    |                                           |                                                                   |
| 1           | van Santen 2021 [17] | N = 308 (HIV/HCV/HBV-negative)<br><br><b>Netherlands</b>                                                                                      | Complete harm reduction program (HRP), partial HRP, and no HRP                                      | Injection frequency, and needle and syringe program (NSP) coverage | Seroconversion                            | Baseline, per 4 – 6 months assessments                            |
| 2           | Feng 2017 [18]       | N = 480 (aged 18 – 70 years, HBsAg anti-HBs and HIV negative)<br><br><b>China</b>                                                             | IM 20, IM 60, and control                                                                           | High-level response rate                                           | Seroconversion                            | Baseline, 6-, 7-, and 12-months assessments                       |
| 3           | Day 2016 [19]        | N = 201 (aged 16 years or older, non-HBV infection, ≤ 1 HBV vaccination dose, unknown infection & vaccination status)<br><br><b>Australia</b> | Incentive and standard of care (SOC)                                                                | Age and vaccination series completion                              | Seroconversion and vaccination completion | Baseline, 12 weeks post-completed vaccination                     |
| 4           | Weaver 2014 [20]     | N = 210 (aged 18 – 65 years, non-HBV infection, and w/o vaccination experiences)                                                              | Escalating value contingency management, fixed value contingency management, and treatment as usual | Gender, race, employment, prison history, and drug use             | Attendance and vaccination completion     | Within 7-, 28-days, and 3 months of the first vaccination (day 0) |

|            |                    |                                                                                                           |                                                                      |                                                                                                                                   |                                                            |                                                                             |
|------------|--------------------|-----------------------------------------------------------------------------------------------------------|----------------------------------------------------------------------|-----------------------------------------------------------------------------------------------------------------------------------|------------------------------------------------------------|-----------------------------------------------------------------------------|
|            |                    | <b>UK</b>                                                                                                 |                                                                      |                                                                                                                                   |                                                            |                                                                             |
| 5          | Bowman 2014 [21]   | N = 595 (aged 18 years or older, non-HBV infection, and w/o vaccination experiences)<br><br><b>USA</b>    | Accelerated HBV vaccination schedule and standard schedule           | Accelerated treatment, age, race, gender, employment, less healthy, and main source of syringes past 3 months                     | Vaccination completion                                     | Baseline, 1-, 2-, 6-, and 7-months assessments                              |
| <b>HCV</b> |                    |                                                                                                           |                                                                      |                                                                                                                                   |                                                            |                                                                             |
| 1          | Tsui 2023 [29]     | N = 501 (aged 18-70 years, HCV-infected, and not treated with direct-acting antivirals)<br><br><b>USA</b> | Modified directly observed therapy (mDOT) and patient navigator (PN) | Age, living situation, and drug substance                                                                                         | Injection practices and sustained virologic response (SVR) | Baseline, end of treatment, 12-, 24-, 36-, 48-, and 60-weeks post-treatment |
| 2          | Marshall 2022 [25] | N = 593 (aged 18 years or older, currently not receiving HCV treatment)<br><br><b>Australia</b>           | Financial incentives and unspecified                                 | Being Aboriginal or Torres Strait Islander, unemployed, completion of secondary school, and mainly injected heroin in month prior | Hepatitis C RNA-positive                                   | Onsite HCV RNA Testing                                                      |
| 3          | Eckhardt 2022 [33] | N = 47 (aged 18 – 29 years, HCV-infected, and treatment-naïve)                                            | Rapid treatment and usual care                                       | Race, insurance, and drug injection                                                                                               | HCV RNA testing and SVR                                    | Baseline, day 2 – 7, treatment initiation, and 12-month assessments         |

|   |                       |                                                                                                        |                                                                                     |                                                                      |                                                                   |                                                            |
|---|-----------------------|--------------------------------------------------------------------------------------------------------|-------------------------------------------------------------------------------------|----------------------------------------------------------------------|-------------------------------------------------------------------|------------------------------------------------------------|
|   |                       | <b>USA</b>                                                                                             |                                                                                     |                                                                      |                                                                   |                                                            |
| 4 | Beer 2022 [27]        | N = 129 (aged 18 – 70 years, HCV-infected, and not co-infected with HBV or HIV)<br><br><b>Scotland</b> | DOT, fortnightly provision, and fortnightly provision w/ psychological intervention | Gender, source of income, and injecting history                      | Treatment adherence and cure rate (SVR <sub>12</sub> )            | Baseline and 12 weeks post-treatment                       |
| 5 | Eckhardt 2022 [28]    | N = 167 (aged 18 years or older, HCV RNA-positive, and treatment-naive)<br><br><b>USA</b>              | Accessible care and usual care                                                      | Incarceration history                                                | SVR and re-infection                                              | Baseline, 3-, 6-, 9-, and 12-months assessments            |
| 6 | van Santen 2021 [17]  | N = 137 (HIV/HCV/HBV-negative)<br><br><b>Netherlands</b>                                               | Complete HRP, partial HRP, and no HRP                                               | Injection frequency, and needle and syringe program (NSP) coverage   | Seroconversion                                                    | Baseline, per 4 – 6 months assessments                     |
| 7 | Hochstatter 2021 [24] | N = 416 (aged 18 years or older)<br><br><b>USA</b>                                                     | Receive medication-assisted treatment (MAT) only, and MAT+A-CHESS                   | Shared injection equipment                                           | HCV testing and SVR <sub>12</sub>                                 | Baseline, 4-, 8-, 12-, 16-, 20-, and 24-months assessments |
| 8 | Fadnes 2021 [32]      | N = 298 (chronic HCV infection)<br><br><b>Norway</b>                                                   | Integrated treatment and treatment as usual                                         | Gender, education, Sources of income, and substance use last 30 days | Time-to-treatment initiation, SVR <sub>12</sub> , and HCV Ab test | Every 4 weeks, 12 weeks post-treatment                     |

|    |                       |                                                                                                                              |                                      |                                                            |                                                               |                                                                 |
|----|-----------------------|------------------------------------------------------------------------------------------------------------------------------|--------------------------------------|------------------------------------------------------------|---------------------------------------------------------------|-----------------------------------------------------------------|
| 9  | Wade 2020 [31]        | N = 136 (age, HCV-infection, treatment-naïve, and not co-infected with HBV or HIV)<br><br><b>Australia &amp; New Zealand</b> | Primer care and local hospital (SOC) | Gender, employment, accommodation, and OST history         | SVR <sub>12</sub> and treatment uptake rate                   | Baseline, 12 weeks post-treatment                               |
| 10 | Papaluca 2020 [34]    | N = 46 (aged 18 – 65 years, active HCV infection, and treatment-naïve)<br><br><b>Australia</b>                               | Care navigation and SOC              | Gender, race, and drug injection                           | Commenced DAA, completion of treatment, and SVR <sub>12</sub> | Baseline, released within 6 months, and 12 weeks post-treatment |
| 11 | Kronfli 2020 [48]     | N = 78 (aged 18 years or older, male inmates, and w/o HCV test experiences)<br><br><b>Canada</b>                             | OraQuick and venipuncture            | Accepted HCV screening rate                                | HCV Ab test and acceptability                                 | Baseline, 10 weeks assessments                                  |
| 12 | Hochstatter 2020 [23] | N = 235 (aged 18 years or older)<br><br><b>USA</b>                                                                           | Hep-Net and control                  | Gender, race, education level, employed, and substance use | Substance use reduction, overdose prevention, and HCV testing | Baseline, 3-, and 6-months post-enrollment                      |
| 13 | Frimpong 2020 [38]    | N = 162 (aged 18 years or older, HCV/HIV status unknown or negative)                                                         | Treatment and SOC                    | Education, and unprotected intercourse in the past month   | HIV/HCV testing                                               | Baseline, 1 month after randomization                           |

|    |                   |                                                                              |                                                           |                                                                                                                                             |                                                                      |                                                                            |
|----|-------------------|------------------------------------------------------------------------------|-----------------------------------------------------------|---------------------------------------------------------------------------------------------------------------------------------------------|----------------------------------------------------------------------|----------------------------------------------------------------------------|
|    |                   | <b>USA</b>                                                                   |                                                           |                                                                                                                                             |                                                                      |                                                                            |
| 14 | Broad 2020 [22]   | N = 380 (aged 18 years or older, HCV Ab status unknown)<br><br><b>Canada</b> | Point-to-case (POC) test and treating-as-usual (TAU)      | Negative healthcare provider experience (past year), frequency of injection drug use, has a primary healthcare provider, and housing status | HCV Ab testing and engagement in HCV care                            | Baseline                                                                   |
| 15 | Solomon 2019 [30] | N = 11721 (aged 18 years or older)<br><br><b>India</b>                       | Integrated care centers (ICC) intervention and usual care | Gender, education, income, alcohol use, even shared needle/syringe, drugs injected in prior 6 months, and even use needle exchange program  | HCV prevalence, self-reported HCV testing history, and SVR           | Baseline, evaluation (2 years later)                                       |
| 16 | Coffin 2019 [35]  | N = 31 (aged 18 years or older, active HCV, genotype 1)<br><br><b>USA</b>    | mDOT and unobserved                                       | Health status, even shared syringes                                                                                                         | HIV/HCV testing, SVR <sub>12</sub> , and reinfection rate            | Baseline, 2-, 8- (end of treatment), 12-, and 36-weeks post-treatment      |
| 17 | Akiyama 2019 [26] | N = 150 (aged 18 years or older, had HCV genotype 1, treatment-naïve)        | DOT, group treatment (GT), and self-administered          | Daily/window timeframe adherence, psychiatric illness,                                                                                      | HCV RNA test, adherence, treatment completion, and SVR <sub>12</sub> | Baseline, 4-, 8-, 12-weeks treatment, and 4-, 12-, 24-weeks post-treatment |

|            |                           |                                                                                            |                                                          |                                                                                                                                                   |                                      |                                        |
|------------|---------------------------|--------------------------------------------------------------------------------------------|----------------------------------------------------------|---------------------------------------------------------------------------------------------------------------------------------------------------|--------------------------------------|----------------------------------------|
|            |                           | <b>USA</b>                                                                                 | individual treatment (SIT)                               | drinking alcohol to intoxication                                                                                                                  |                                      |                                        |
| <b>HIV</b> |                           |                                                                                            |                                                          |                                                                                                                                                   |                                      |                                        |
| 1          | Van Sluytman 2022 [36]    | N = 696 (aged 18 years or older, 232 HIV-negative & 464 network members)<br><br><b>USA</b> | Low-risk, paraphernalia risk, and high sex/moderate risk | Age and money/drugs for sex                                                                                                                       | HIV support and risk networks        | Baseline, and 6-month follow-up        |
| 2          | Ha 2022 [44]              | N = 502 (aged 18 – 45 years, HIV-infected)<br><br><b>Indonesia, Ukraine, and Vietnam</b>   | The integrated intervention of supported ART and SOC     | Numbers of injected/non-injected other drugs in last 3 months, days injected drugs last month, CD <sub>4</sub> count at screening, and study site | ART acceptance and adherence         | Baseline, 26-, and 52-weeks visits     |
| 3          | Garcia-Cremades 2022 [37] | N = 177 (aged 20 – 60 years, HIV-negative)<br><br><b>Thailand</b>                          | Daily oral Tenofovir (TDF) and daily oral placebo        | Gender and drug injection frequency                                                                                                               | Seroconversion (i.e., new diagnoses) | Baseline, per 3 months assessments     |
| 4          | van Santen 2021 [17]      | N = 640 (HIV/HCV/HBV-negative)<br><br><b>Netherlands</b>                                   | Complete HRP, partial HRP, and no HRP                    | Injection frequency, and needle and syringe program (NSP) coverage                                                                                | Seroconversion (i.e., new diagnoses) | Baseline, per 4 – 6 months assessments |

|   |                               |                                                                                                                            |                                                           |                                                                                                                                            |                                                                                                                                                 |                                         |
|---|-------------------------------|----------------------------------------------------------------------------------------------------------------------------|-----------------------------------------------------------|--------------------------------------------------------------------------------------------------------------------------------------------|-------------------------------------------------------------------------------------------------------------------------------------------------|-----------------------------------------|
| 5 | Frimpong 2020 [38]            | N = 162 (aged 18 years or older, HCV/HIV status unknown or negative)<br><br><b>USA</b>                                     | Treatment and SOC                                         | Education and unprotected intercourse in the past month                                                                                    | HIV/HCV testing (i.e., new diagnoses)                                                                                                           | Baseline, 1 month after randomization   |
| 6 | Solomon 2019 [43]             | N = 11721 (aged 18 years or older)<br><br><b>India</b>                                                                     | Integrated care centers (ICC) intervention and usual care | Gender, education, income, alcohol use, even shared needle/syringe, drugs injected in prior 6 months, and even use needle exchange program | Self-reported HIV testing, HIV prevalence, seroconversion, viral suppression, and effectiveness                                                 | Baseline and evaluation (2 years later) |
| 7 | Brinkley-Rubinstein 2018 [45] | N = 179 (aged 18 years or older, incarcerated, and had engaged in methadone-maintenance treatment (MMT))<br><br><b>USA</b> | MMT continuation group and SOC                            | Duration of incarceration (days), drug use at 12 months (prior 30 days), and HIV risk behaviors (prior 30 days)                            | Engagement in MMT, re-arrest, re-incarceration, fatal and non-fatal overdose, emergency department usage, substance use, and HIV risk behaviors | 1-, 6-, and 12-months post-release      |
| 8 | Miller 2018 [39]              | N = 502 (aged 18 – 60 years, HIV-infected) and 806 injection partners (HIV-negative)                                       | The integrated intervention of supported ART and SOC      | Little access to ART and medication-assisted treatment (MAT)                                                                               | ART acceptance, ART use, HIV incidence, and viral suppression                                                                                   | Baseline and 12 – 24 months followed up |

|    |                            |                                                                       |                                                                                                       |                                                                                                                                                                                                                 |                                                                                        |                                              |
|----|----------------------------|-----------------------------------------------------------------------|-------------------------------------------------------------------------------------------------------|-----------------------------------------------------------------------------------------------------------------------------------------------------------------------------------------------------------------|----------------------------------------------------------------------------------------|----------------------------------------------|
|    |                            | <b>Indonesia,<br/>Ukraine, and<br/>Vietnam</b>                        |                                                                                                       |                                                                                                                                                                                                                 |                                                                                        |                                              |
| 9  | Martin 2017<br>[40]        | N = 1315 (aged 20 – 60 years, HIV-negative)<br><br><b>Thailand</b>    | TDF and placebo                                                                                       | Age, injected heroin, and had incarcerated experiences                                                                                                                                                          | HIV incidence, PrEP uptake, and PrEP adherence                                         | Baseline, per 3 months assessments           |
| 10 | Booth 2016<br>[41]         | N = 1200 (aged 16 years or older, HIV-negative)<br><br><b>Ukraine</b> | Testing and counseling block plus social network intervention block, and testing and counseling block | Age, daily injector, mean years of injecting, mean log injection frequency, front and back loading with others, front and back loading with dealer/others/both , shared works, and more than one sexual partner | Reducing drug and sex risk behaviors and seroconversion                                | Baseline, 6-, and 12-months assessments      |
| 11 | Mihailovic 2015<br>[47]    | N = 227 (aged 18 years or older)<br><br><b>USA</b>                    | Experimental and control                                                                              | Education, needle sharing, and condom use                                                                                                                                                                       | HIV testing and the effect of interventions on the change in frequency of conversation | Baseline, 6-, 12-, and 18-months assessments |
| 12 | Mackesy-Amiti 2014<br>[42] | N = 854 (aged 15 – 30 years, HIV/HCV-negative)                        | Peer education intervention (PEI) and video-discussion control                                        | Race, homeless past 6 months, binge alcohol weekly, number of sex partners, and                                                                                                                                 | Effect of intervention on the change in sexual risk behavior                           | Baseline, 3-, and 6-months assessments       |

|  |  |            |  |                         |  |  |
|--|--|------------|--|-------------------------|--|--|
|  |  | <b>USA</b> |  | casual male<br>partners |  |  |
|--|--|------------|--|-------------------------|--|--|
